# Supplementary material for: Patterns of Tobacco Use and Dual Use in US Young Adults: The Missing Link between Youth Prevention and Adult Cessation
Source: Hindawi journal article supplement (doi:10.1155/2012/679134), 2012-01-01
Supplement: f1 [file 679134.f1.pdf]

## Appendix A: KnowledgePanel® Demographic Comparisons – 18-34 Year Olds – August 2011

|                                                |                                      | Adult Panel Members <sup>1</sup> | Adult U.S. Population<br>(June 2011 CPS <sup>2</sup><br>except as footnoted) |
|------------------------------------------------|--------------------------------------|----------------------------------|------------------------------------------------------------------------------|
| <b>Gender</b>                                  | Male                                 | 49.5%                            | 50.3%                                                                        |
|                                                | Female                               | 50.5%                            | 49.7%                                                                        |
| <b>Age</b>                                     | 18–24                                | 41.9%                            | 41.8%                                                                        |
|                                                | 25–34                                | 58.1%                            | 58.2%                                                                        |
| <b>Race</b>                                    | White Only                           | 73.4%                            | 77.3%                                                                        |
|                                                | Black (African American) Only        | 15.8%                            | 14.2%                                                                        |
|                                                | American Indian, Alaskan Native Only | 0.8%                             | 1.0%                                                                         |
|                                                | Asian Only                           | 3.4%                             | 5.1%                                                                         |
|                                                | Hawaiian or Pacific Islander Only    | 0.8%                             | 0.3%                                                                         |
|                                                | 2+ Races                             | 5.8%                             | 2.1%                                                                         |
| <b>Hispanic Ethnicity</b>                      | Hispanic                             | 19.7%                            | 19.5%                                                                        |
|                                                | Non-Hispanic                         | 80.3%                            | 80.5%                                                                        |
| <b>Employment Status</b>                       | In the Labor Force                   | 84.2%                            | 75.7%                                                                        |
|                                                | Employed                             | 62.5%                            | 66.3%                                                                        |
|                                                | Unemployed                           | 21.7%                            | 9.4%                                                                         |
|                                                | Not in the Labor Force               | 15.8%                            | 24.3%                                                                        |
| <b>Marital Status</b>                          | Married                              | 34.2%                            | 30.6%                                                                        |
|                                                | Not Married                          | 65.8%                            | 69.4%                                                                        |
| <b>Housing Ownership<sup>3</sup></b>           | Own                                  | 53.7%                            | 53.4%                                                                        |
|                                                | Rent/Other                           | 46.3%                            | 46.6%                                                                        |
| <b>Level of Education</b>                      | Less than High School Diploma        | 15.6%                            | 14.5%                                                                        |
|                                                | High School Diploma or Equivalent    | 30.3%                            | 28.4%                                                                        |
|                                                | Some College                         | 31.6%                            | 33.9%                                                                        |
|                                                | Bachelor's Degree or Beyond          | 22.6%                            | 23.3%                                                                        |
| <b>Household Income<sup>4</sup></b>            | Under \$10,000                       | 7.3%                             | 8.4%                                                                         |
|                                                | \$10,000–\$24,999                    | 16.0%                            | 17.1%                                                                        |
|                                                | \$25,000–\$49,999                    | 25.8%                            | 27.4%                                                                        |
|                                                | \$50,000–\$74,999                    | 17.2%                            | 19.6%                                                                        |
|                                                | \$75,000 or more                     | 33.7%                            | 27.5%                                                                        |
| <b>Census Region</b>                           | Northeast                            | 16.7%                            | 17.7%                                                                        |
|                                                | Midwest                              | 21.1%                            | 21.2%                                                                        |
|                                                | South                                | 37.2%                            | 36.8%                                                                        |
|                                                | West                                 | 25.1%                            | 24.3%                                                                        |
| <b>Internet Access (Household)<sup>5</sup></b> | Any Connection Speed                 | 75.6%                            | 78.2%                                                                        |
|                                                | Broadband                            | 73.1%                            | 76.8%                                                                        |

**When you are making a marketing investment decision or conducting social science research, only KnowledgePanel® will do!**

<sup>1</sup> Active profiled adults are weighted to be representative of the U.S. population on age, gender, race, Hispanic ethnicity, language proficiency, region, metro status, education, household income, homeownership, and Internet access using post-stratification adjustments to offset any non-response or non-coverage bias.

<sup>2</sup> Estimates were calculated using June 2011 CPS microdata available at [www.census.gov](http://www.census.gov). The data are weighted using CPS final individual weights.

<sup>3</sup> National housing statistics are from March 2010 CPS Annual Social and Economic Supplement.

<sup>4</sup> National income statistics are from March 2010 CPS Annual Social and Economic Supplement.

<sup>5</sup> National Internet coverage statistics are from October 2010 CPS Internet and Computer Usage Supplement.
